# Supplementary material for: The connection between childhood maltreatment and eating disorder psychopathology: a network analysis study in people with bulimia nervosa and with binge eating disorder
Source: PubMed Central journal article supplement (PMC8860810; doi:10.1007/s40519-021-01169-6), 2021-03-28

● Bootstrap mean ● Sample

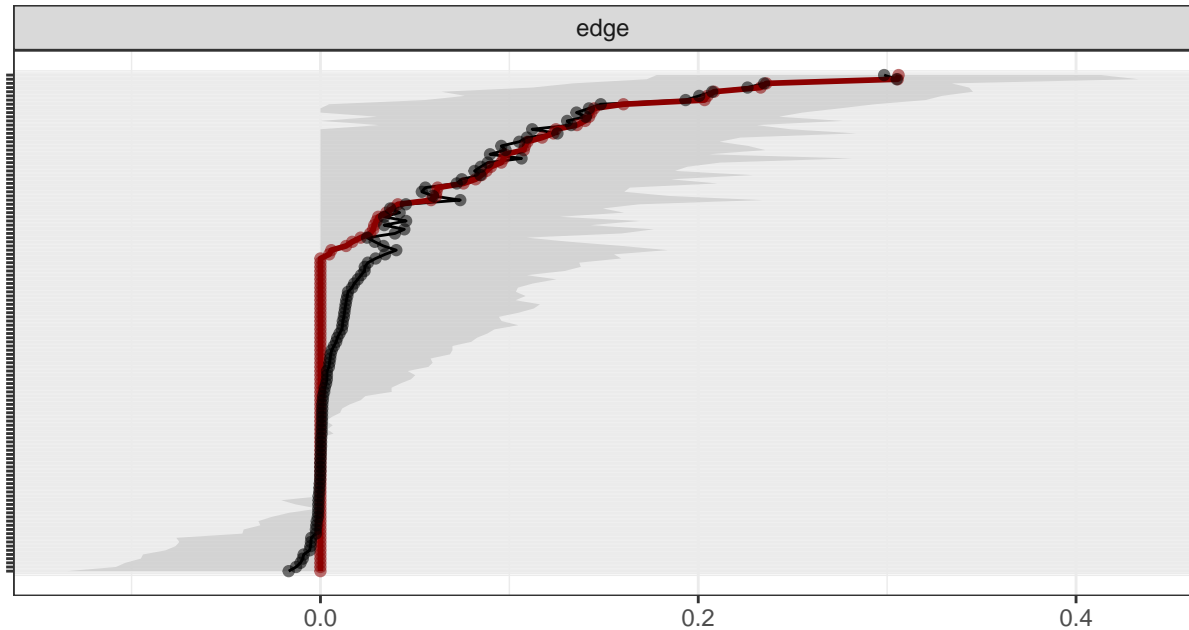

Supplement: 40519_2021_1169_MOESM2_ESM.pdf [file 40519_2021_1169_MOESM2_ESM.pdf]
